# Supplementary material for: Thermally stable ultra-small Pd nanoparticles encapsulated by silica: elucidating the factors determining the inherent activity of noble metal catalysts
Source: Royal Society of Chemistry journal article supplement (doi:10.1039/c6cy00201c), 2016-01-01
Supplement: c6cy00201c1.pdf [file c6cy00201c1.pdf]

## Electronic Supplementary Information

### Thermally Stable Ultra-Small Pd Nanoparticles Encapsulated by Silica: Elucidating the Reasons Determining the Inherent Activity of Noble Metal Catalysts

Jiawei Ying,<sup>†a</sup> Honggen Peng,<sup>†a</sup> Xianglan Xu,<sup>a</sup> Ruonan Wang,<sup>a</sup> Fan Yu,<sup>a</sup> Qi Sun,<sup>a</sup> Wenming Liu,<sup>a</sup>  
Zhixian Gao,<sup>b</sup> Xiang Wang<sup>\*a</sup>

<sup>a</sup> Institute of Applied Chemistry, College of Chemistry,

Nanchang University, Nanchang, Jiangxi 330031, P. R. China

<sup>b</sup> Institute of Coal Chemistry, Chinese Academy of Sciences, Taiyuan 030001, China.

<sup>†</sup> These authors contributed equally to this work.

\* Corresponding author. Tel: +86 15979149877. E-mail: xwang23@ncu.edu.cn

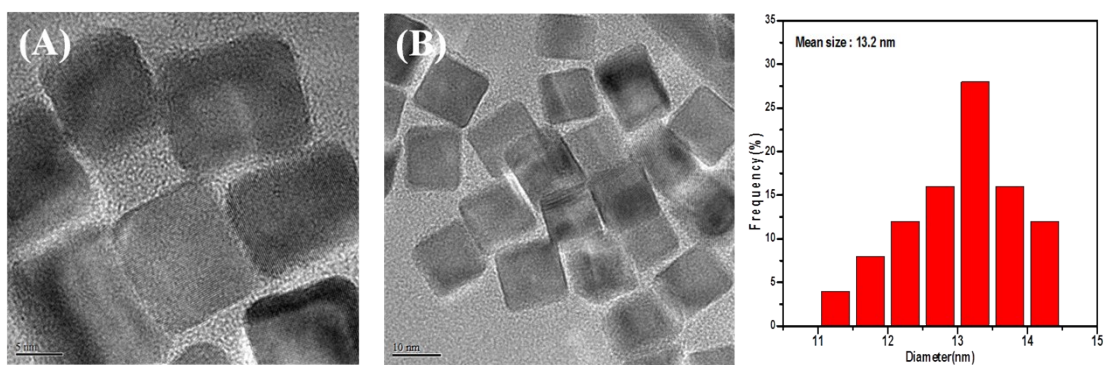

Fig. S1. HRTEM images of Cubic Pd nanoparticles .

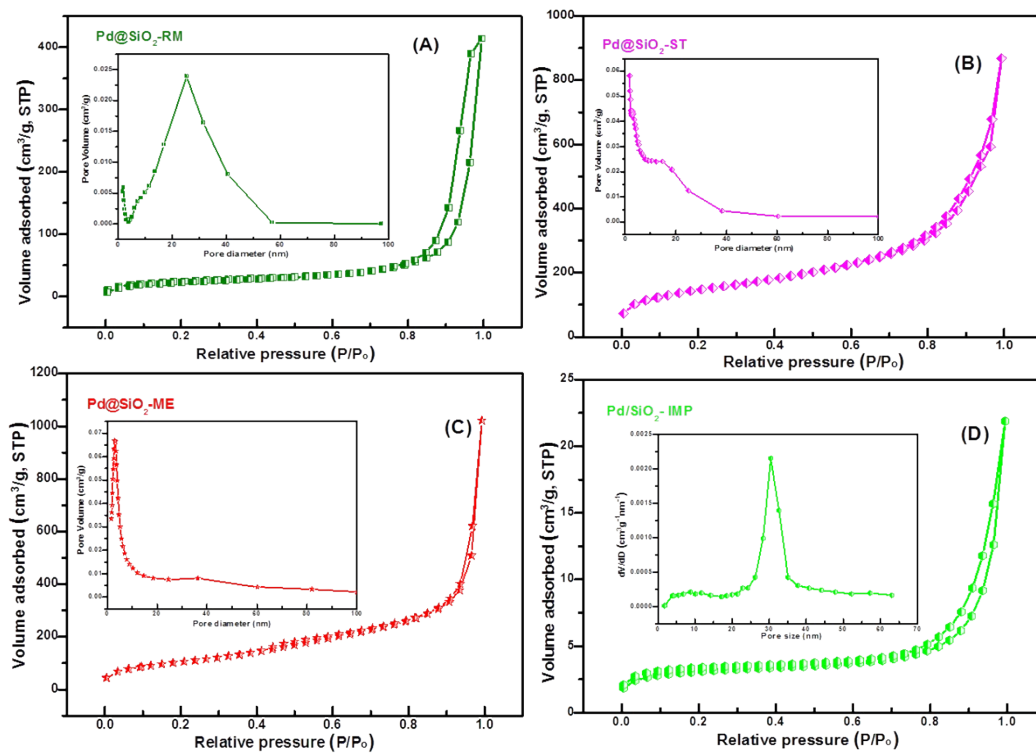

**Fig. S2.**  $N_2$  adsorption–desorption and pore size distributions of A) Pd@SiO<sub>2</sub>-RM, B) Pd@SiO<sub>2</sub>-ST, C) Pd@SiO<sub>2</sub>-ME, and D) Pd/SiO<sub>2</sub>-IMP.

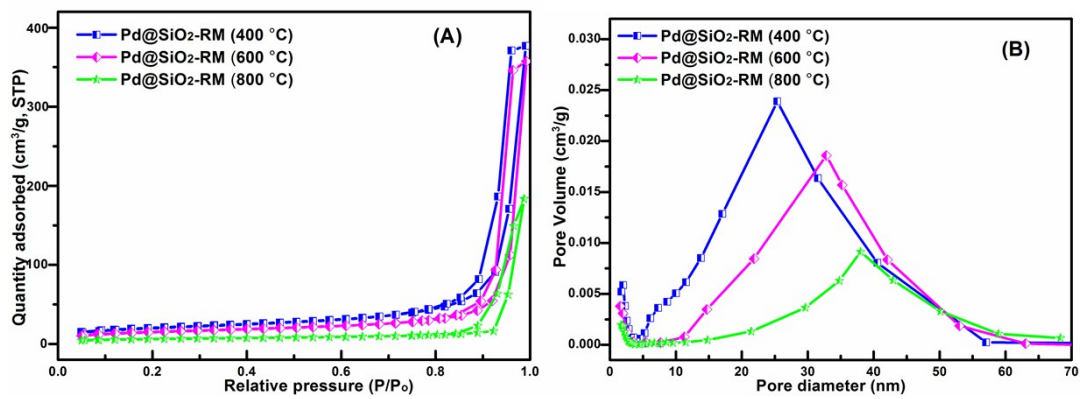

**Fig. S3.** (A) N<sub>2</sub> adsorption-desorption and (B) pore size distributions of Pd@SiO<sub>2</sub>-RM calcined at different temperatures.

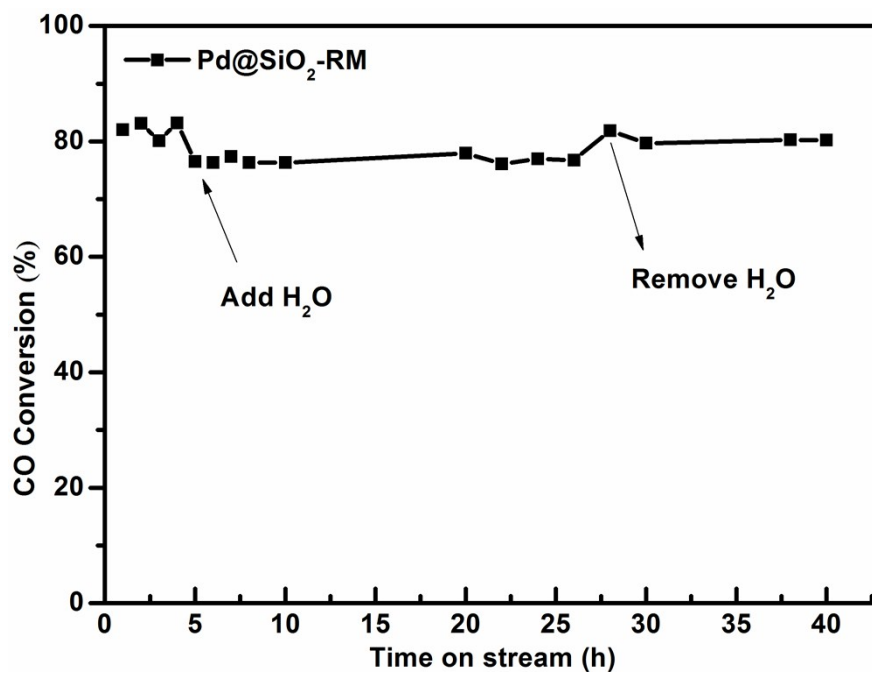

Fig. S4. Water resistance and durability test of Pd@SiO<sub>2</sub>-RM catalyst for CO oxidation.
